# Supplementary material
Source: PubMed Central journal article supplement (PMC5650093)
Supplement: NIHMS881202-supplement-Supplementary_Tables.pdf [file NIHMS881202-supplement-Supplementary_Tables.pdf]

**Table S1. Individual Phenotypic Index Characteristics and Separated MC1R Genotypes in Relationship to Histopathologic Pigmentation in Incident Primary Melanomas from 2387 patients in the GEM Study**

| Characteristics          | Pigmented Melanoma<br>(n = 2209) <sup>a</sup> | Amelanotic Melanoma<br>(n = 178) <sup>a</sup> | Amelanotic vs. Pigmented Melanoma  |                      |                                                |                      |                                                              |                      |
|--------------------------|-----------------------------------------------|-----------------------------------------------|------------------------------------|----------------------|------------------------------------------------|----------------------|--------------------------------------------------------------|----------------------|
|                          |                                               |                                               | Study Design Features <sup>b</sup> |                      | Study Design Features + Phenotype <sup>c</sup> |                      | Study Design Features + Phenotype + <i>MC1R</i> <sup>d</sup> |                      |
|                          |                                               |                                               | OR (95% CI)                        | P Value <sup>e</sup> | OR (95% CI)                                    | P Value <sup>e</sup> | OR (95% CI)                                                  | P Value <sup>e</sup> |
| <u>Phenotype</u>         |                                               |                                               |                                    |                      |                                                |                      |                                                              |                      |
| <u>Hair Color</u>        |                                               |                                               |                                    |                      |                                                |                      |                                                              |                      |
| Black/Dark Brown         | 655 (29.7)                                    | 53 (29.8)                                     | 1 [Reference]                      |                      | 1 [Reference]                                  |                      | 1 [Reference]                                                |                      |
| Light Brown/Blonde       | 1348 (61.0)                                   | 99 (55.6)                                     | 0.99 (0.69-1.42)                   | 0.96                 | 0.83 (0.57-1.22)                               | 0.35                 | 0.82 (0.56-1.21)                                             | 0.32                 |
| Red                      | 206 (9.3)                                     | 26 (14.6)                                     | 1.83 (1.09-3.07)                   | 0.02                 | 1.22 (0.69-2.16)                               | 0.49                 | 1.31 (0.63-2.70)                                             | 0.47                 |
| <u>Eye Color</u>         |                                               |                                               |                                    |                      |                                                |                      |                                                              |                      |
| Brown                    | 426 (19.3)                                    | 26 (14.6)                                     | 1 [Reference]                      |                      | 1 [Reference]                                  |                      | 1 [Reference]                                                |                      |
| Grey/green/hazel         | 842 (38.1)                                    | 63 (35.4)                                     | 1.42 (0.87-2.32)                   |                      | 1.40 (0.85-2.30)                               |                      | 1.39 (0.84-2.29)                                             |                      |
| Blue                     | 941 (42.6)                                    | 89 (50.0)                                     | 1.74 (1.09-2.77)                   |                      | 1.73 (1.06-2.82)                               |                      | 1.73 (1.06-2.83)                                             |                      |
| P value for trend        |                                               |                                               |                                    | 0.02                 |                                                | 0.03                 |                                                              | 0.03                 |
| <u>Ability to Tan</u>    |                                               |                                               |                                    |                      |                                                |                      |                                                              |                      |
| Deeply/moderately        | 1263 (57.2)                                   | 85 (47.8)                                     | 1 [Reference]                      | 0.006                | 1 [Reference]                                  | 0.05                 | 1 [Reference]                                                | 0.07                 |
| Occasionally/none        | 946 (42.8)                                    | 93 (52.3)                                     | 1.58 (1.14-2.18)                   |                      | 1.40 (1.00-1.98)                               |                      | 1.37 (0.97-1.95)                                             |                      |
| <u>Back nevi</u>         |                                               |                                               |                                    |                      |                                                |                      |                                                              |                      |
| Present                  | 1904 (86.2)                                   | 139 (78.1)                                    | 1 [Reference]                      | 0.006                | 1 [Reference]                                  | 0.02                 | 1 [Reference]                                                | 0.02                 |
| Absent                   | 305 (13.8)                                    | 39 (21.9)                                     | 1.76 (1.18-2.65)                   |                      | 1.65 (1.10-2.49)                               |                      | 1.64 (1.09-2.47)                                             |                      |
| <u>Freckles</u>          |                                               |                                               |                                    |                      |                                                |                      |                                                              |                      |
| None to few              | 1912 (86.6)                                   | 143 (80.3)                                    | 1 [Reference]                      | 0.007                | 1 [Reference]                                  | 0.15                 | 1 [Reference]                                                | 0.21                 |
| Many                     | 297 (13.4)                                    | 35 (19.7)                                     | 1.76 (1.17-2.65)                   |                      | 1.40 (0.89-2.19)                               |                      | 1.34 (0.85-2.12)                                             |                      |
| <u>Genetics</u>          |                                               |                                               |                                    |                      |                                                |                      |                                                              |                      |
| <i>MC1R</i> <sup>f</sup> |                                               |                                               |                                    |                      |                                                |                      |                                                              |                      |
| wt/wt                    | 357 (16.2)                                    | 23 (12.9)                                     | 1 [Reference]                      |                      | -                                              | -                    | 1 [Reference]                                                |                      |
| wt/r                     | 479 (21.7)                                    | 34 (19.1)                                     | 1.15 (0.66-2.02)                   |                      | -                                              | -                    | 1.13 (0.64-1.98)                                             |                      |
| wt/R                     | 501 (22.7)                                    | 35 (19.7)                                     | 1.18 (0.67-2.06)                   |                      | -                                              | -                    | 1.16 (0.66-2.04)                                             |                      |
| r/r                      | 223 (10.1)                                    | 20 (11.2)                                     | 1.48 (0.78-2.81)                   |                      | -                                              | -                    | 1.43 (0.75-2.73)                                             |                      |
| R/r                      | 429 (19.4)                                    | 43 (24.2)                                     | 1.71 (0.99-2.95)                   |                      | -                                              | -                    | 1.42 (0.81-2.51)                                             |                      |
| R/R                      | 220 (10.0)                                    | 23 (12.9)                                     | 1.90 (1.02-3.56)                   |                      | -                                              | -                    | 1.08 (0.48-2.46)                                             |                      |
| P value for trend        |                                               |                                               |                                    | 0.007                |                                                |                      |                                                              | 0.27                 |

Abbreviations: CI, confidence interval; GEM, genes, environment, and melanoma; MC1R, melanocortin 1 receptor; MPM, multiple primary melanoma; OR, odds ratio; SPM, single primary melanoma.

<sup>a</sup>Data are given as number (percentage) of melanomas unless otherwise specified.

<sup>b</sup>Adjusted for study design features: sex, age, study center, and lesion status (SPM or index MPM)

<sup>c</sup>Adjusted for study design features, freckling, back moles, hair color, eye color, and ability to tan.

<sup>d</sup>Adjusted for study design features and all characteristics displayed in the table.

<sup>e</sup>P values were calculated according to logistic regression models and P values for trend were calculated including MC1R categories as ordinal variables.

<sup>f</sup>*MC1R* "R": D84E, R142H, R151C, R160W, and D294H, all nonsense and insertion/deletion; "r": all other variants; "wt": consensus.

**Table S2. *MITF* E318K in Relationship to Histopathologic Pigmentation in Incident Primary Melanomas from 2361 patients in the GEM Study<sup>a</sup>**

|                                   | Pigmented Melanoma | Amelanotic Melanoma | Amelanotic vs. Pigmented Melanoma |                             |
|-----------------------------------|--------------------|---------------------|-----------------------------------|-----------------------------|
| <i>MITF</i> E318K Mutation Status | n (%) <sup>b</sup> | n (%) <sup>b</sup>  | OR (95%CI)                        | <i>P</i> Value <sup>c</sup> |
| Absent                            | 2127 (97.4)        | 173 (97.7)          | 1 [Reference]                     | 0.82                        |
| Present                           | 57 (2.6)           | 4 (2.3)             | 0.86 (0.22-2.37)                  |                             |

Abbreviations: CI, confidence interval; OR, odds ratio.

<sup>a</sup>Patients with missing data for *MITF* E318K mutation status (n=26) were excluded.

<sup>b</sup>Data are given as number (percentage) of melanomas.

<sup>c</sup>*P* value was calculated using an exact logistic regression model.
